## Retraction: LncRNA MALAT1 acts as an oncogene in multiple myeloma through sponging miR5095p to modulate FOXP1 expression

Yueli Gu<sup>1</sup>, Xichun Xiao<sup>1</sup> and Shuo Yang<sup>1</sup>

<sup>1</sup>Department of Hematology, The First People's Hospital of Shangqiu, Shangqiu 476100, China

**Published:** May 20, 2026

**Copyright:** © 2026 Gu et al. This is an open access article distributed under the terms of the [Creative Commons Attribution License](#) (CC BY 4.0), which permits unrestricted use, distribution, and reproduction in any medium, provided the original author and source are credited.

**This article has been retracted:** Oncotarget has concluded its investigation of this paper, and the following issues were discovered:

- Figure 2C: The four panels in the colony formation assay are duplicates of four panels in Figure 2C of an unrelated article [1], which was published concurrently and recently retracted.
- Figure 3A: The tumors shown are identical to those appearing in Figure 3B of reference [2] and Figure 4B of reference [3], both of which are unrelated papers from 2017.
- Figure 6C: The western blots for FOXP1 in OPM-2 and U266 cells are duplicates.
- Figure 7D: The FOXP1 western blots for OPM-2 and U266 cells are reproduced in Figure 4 of a 2018 article [4] as c-Myc and Cyclin D1, respectively.

As there has been no response to our requests for comment or the original data, the editorial decision has been made to retract this paper. We have reached out to all authors regarding this notification but have not received a reply.

Original article: Oncotarget. 2017; 8:101984–101993. <https://doi.org/10.18632/oncotarget.21957>

### REFERENCES

1. Zhu KP, Ma XL, Zhang CL. RETRACTED: LncRNA ODRUL Contributes to Osteosarcoma Progression through the miR-3182/MMP2 Axis. *Mol Ther.* 2017; 25:2383–93. <https://doi.org/10.1016/j.ymthe.2017.06.027>. [PubMed]. Retraction in: *Mol Ther.* 2025; 33:4008. <https://doi.org/10.1016/j.ymthe.2025.06.030>. [PubMed]
2. Gu XD, Xu LL, Zhao H, Gu JZ, Xie XH. Cantharidin suppressed breast cancer MDA-MB-231 cell growth and migration by inhibiting MAPK signaling pathway. *Braz J Med Biol Res.* 2017; 50:e5920. <https://doi.org/10.1590/1414-431X20175920>. [PubMed]
3. Zhang LQ, Lv RW, Qu XD, Chen XJ, Lu HS, Wang Y. Aloesin Suppresses Cell Growth and Metastasis in Ovarian Cancer SKOV3 Cells through the Inhibition of the MAPK Signaling Pathway. *Anal Cell Pathol (Amst).* 2017; 2017:8158254. <https://doi.org/10.1155/2017/8158254>. [PubMed]
4. Liu S, Liu Y, Lu Q, Zhou X, Chen L, Liang W. The lncRNA *TUG1* promotes epithelial ovarian cancer cell proliferation and invasion via the WNT/β-catenin pathway. *Onco Targets Ther.* 2018; 11:6845–51. <https://doi.org/10.2147/OTT.S167900>. [PubMed]. Retraction in: *Onco Targets Ther.* 2019; 12:1041. <https://doi.org/10.2147/OTT.S203520>. [PubMed]
